# Supplementary material for: MoCbp7, a Novel Calcineurin B Subunit-Binding Protein, Is Involved in the Calcium Signaling Pathway and Regulates Fungal Development, Virulence, and ER Homeostasis in Magnaporthe oryzae
Source: MDPI journal article supplement (doi:10.3390/ijms24119297), 2023-05-26
Supplement: s1 [file s1]

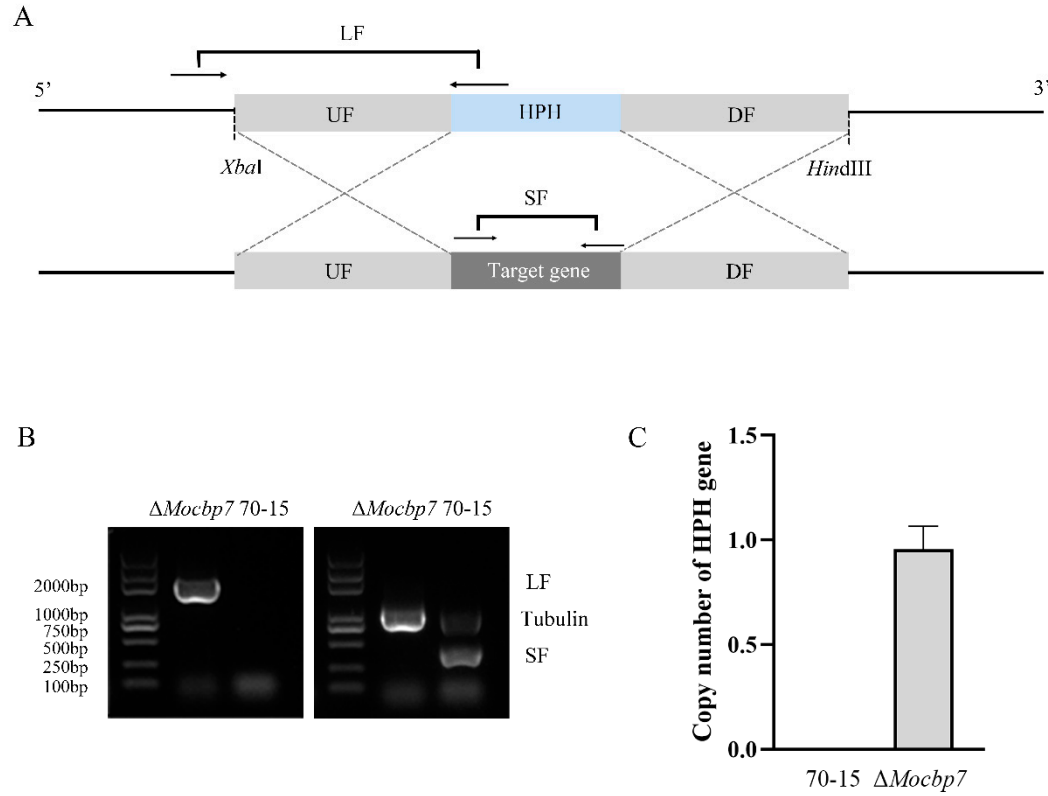

**Figure S1.** Identification of knockout mutants. (A) The knockout model in *M. oryzae*. (B) The  $\Delta Mocbp7$  mutant was verified deletion of *MoCBP7* by PCR. (LF, long fragment; SF, short fragment) (C) Insertion copy number of the HPH gene in 70-15 and the  $\Delta Mocbp7$  mutant.

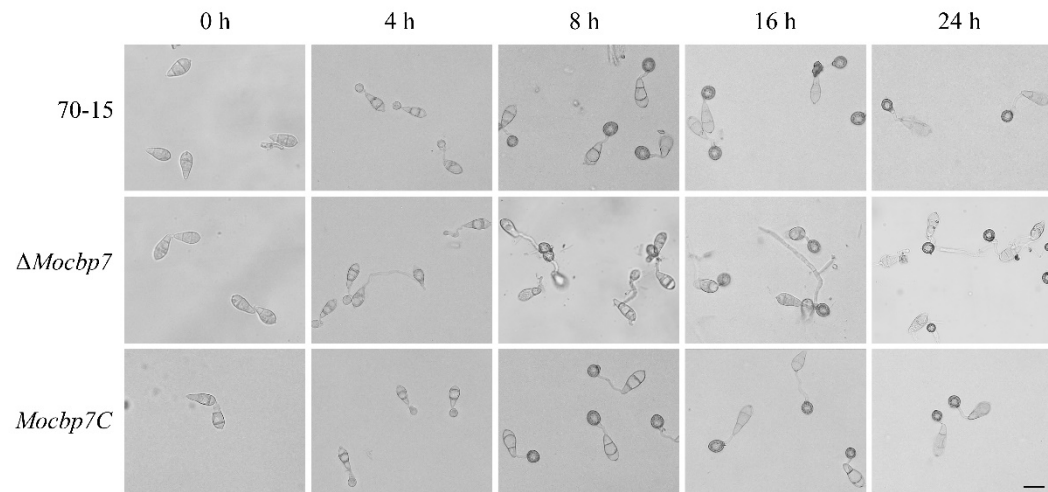

**Figure S2.** Appressorium formation images of conidia induced on hydrophobic coverslips at 0 hpi, 4 hpi, 8 hpi, 16 hpi, 24 hpi. Bar, 10  $\mu m$ .

**Table S1.** List of potentially interacting proteins with MoCbp7 screened the rice blast fungus cDNA library.

| Gene ID   | Gene description in NCBI                             | Validation of interactions by Y2H |
|-----------|------------------------------------------------------|-----------------------------------|
| MGG_04764 | cystathionine gamma-synthase                         |                                   |
| MGG_10179 | dolichyl-phosphate mannosyltransferase polypeptide 2 |                                   |
| MGG_06952 | ribosomal protein L38e                               |                                   |
| MGG_07467 | pyruvate dehydrogenase kinase                        | √                                 |
| MGG_10910 | aflatoxin biosynthesis ketoreductase nor-1           |                                   |
| MGG_06044 | ubiquitin-60S ribosomal protein L40                  |                                   |
| MGG_08785 | X-Pro dipeptidyl-peptidase                           |                                   |
| MGG_03441 | trehalose-phosphatase                                |                                   |
| MGG_07218 | transcription factor                                 | √                                 |
| MGG_14773 | AGC/AKT protein kinase                               |                                   |
| MGG_06728 | meiotic recombination protein rec14                  |                                   |
| MGG_15291 | pheromone processing endoprotease KexB               |                                   |
| MGG_06936 | elongation factor 1-gamma                            |                                   |
| MGG_00703 | MAS3 protein                                         |                                   |
| MGG_01742 | elongation factor 2                                  |                                   |
| MGG_06933 | calcineurin subunit B                                | √                                 |
| MGG_03226 | cytochrome b-c1 complex subunit 2                    |                                   |
| MGG_04477 | DNA-directed RNA polymerase III subunit              |                                   |
| MGG_02690 | Arg-6 protein                                        |                                   |
| MGG_06505 | mRNA cap guanine-N7 methyltransferase mRNA           |                                   |
| MGG_02634 | coatomer subunit gamma                               |                                   |
| MGG_10315 | hydrophobin-like protein MPG1                        |                                   |
| MGG_02086 | proteasome component PRE3                            |                                   |
| MGG_04978 | E3 ubiquitin ligase complex SCF subunit scon-3       |                                   |
| MGG_08829 | transcriptional repressor rco-1                      |                                   |
| MGG_08832 | C-5 sterol desaturase                                |                                   |
| MGG_07110 | phosphatidylethanolamine N-methyltransferase         |                                   |
| MGG_10447 | peptidyl-prolyl cis-trans isomerase                  | √                                 |
| MGG_04087 | thiosulfate sulfurtransferase                        |                                   |
| MGG_06860 | coatomer subunit beta                                |                                   |
| MGG_09310 | dolichyl pyrophosphate                               |                                   |
| MGG_07134 | polyamine acetyltransferase                          |                                   |
| MGG_01556 | V-type proton ATPase subunit F                       |                                   |
| MGG_05097 | transmembrane domain-containing protein              |                                   |
| MGG_06152 | GMF family protein                                   |                                   |
| MGG_05528 | hob3                                                 |                                   |
| MGG_01061 | coproporphyrinogen III oxidase                       |                                   |

|           |                                     |   |
|-----------|-------------------------------------|---|
| MGG_06722 | 1,3-beta-glucanosyltransferase gel2 |   |
| MGG_02953 | 60S ribosomal protein L21-B         |   |
| MGG_01135 | cytochrome c oxidase polypeptide IV |   |
| MGG_01282 | polyubiquitin                       |   |
| MGG_12122 | CMGC/GSK                            |   |
| MGG_09495 | Arp2/3 complex subunit              | √ |
| MGG_06930 | hypothetical protein                |   |
| MGG_06374 | hypothetical protein                |   |

**Table S2.** Primers used in this study.

| Primer name                                   | Primer                                    |
|-----------------------------------------------|-------------------------------------------|
| <b>Primers for gene knock out</b>             |                                           |
| CBP7-UPF                                      | AGGCTAACTGACACTCTAGAGACGGCAAAGCCGGACAAAA  |
| CBP7-UPR                                      | TGTTGACCTCCACTACGCAAAGCACTTTCAGTCACG      |
| CBP7-DOWNF                                    | GGAATAGAGTAGATGCGCTTCCCATTTCACACG         |
| CBP7-DOWNR                                    | CGACGGCCAGTGCCAAGCTTTACCGCATGACAACATGCT   |
| CBP7-LONG-F                                   | GCGAGCTTAAGCACATCGAGC                     |
| CBP7-SF                                       | CCAAATATCCTATCTCACGTC                     |
| CBP7-SR                                       | AATGATATGGGGTTGTTGCTC                     |
| YHPH-R                                        | GATAATAATGTCCTCGTTCC                      |
| HPH-F                                         | TAGTGGAGGTCAACAATGAATG                    |
| HPH-R                                         | CATCTACTCTATTCTTTGCC                      |
| CBP7C-F                                       | TGCCCCGTCACCGAGATTTAG TGAGCAACATGGTACACGG |
| CBP7C-R                                       | GTCGTGGTCCTTGTAGTC TGCAATGCTCCACACGGGCGC  |
| Tubulin-F                                     | ACAACCTTCGTCTTCGGTCAG                     |
| Tubulin-R                                     | GTGATCTGGAAACCCTGGAG                      |
| <b>Primers for quantitative real-time PCR</b> |                                           |
| H3-F                                          | CGAGCTTCTGATCCGCAAG                       |
| H3-R                                          | TCAAAGAGCGAGACAAGGTATG                    |
| TUBULIN-F                                     | GCAGATGTTTCGACCCCAAG                      |
| TUBULIB-R                                     | ACGAGTTCTTGTCTGGACG                       |
| YVC-F                                         | TGGTTCTCGCATCAATCCTC                      |
| YVC-R                                         | CTTGTGCTGGAGATACTCTGTG                    |
| VCX-F                                         | AGGACTCATTAACGCCACG                       |
| VCX-R                                         | TCGATCTGCCCTTGTTTGAG                      |
| PMC1-F                                        | GTTTCGTGTGGATGCAAATTTTC                   |
| PMC1-R                                        | TTGGTGATAAGTGCCTGAGC                      |
| PMR1-F                                        | ACAAGTTACCAAGCTGAGGG                      |
| PMR1-R                                        | GCAAGGACGAAGGACACAG                       |
| CMD1-F                                        | CCTCGTTGATCATATCCTGCAG                    |
| CMD1-R                                        | CCTCGTTGATCATATCCTGCAG                    |
| CNA-F                                         | GTTTCTTTGTATTACGGTGCC                     |

|                                     |                                        |
|-------------------------------------|----------------------------------------|
| CNA-R                               | AAGGATATCGCACATCAGGC                   |
| CNB-F                               | AAAGCTCCAACTTCGATAGGG                  |
| CNB-R                               | GCAATCATTCTGTGGCAAG                    |
| RCN1-F                              | GCAAAACGATATCAGGCCATC                  |
| RCN1-R                              | TTGGTGAAGAGTAGGGTGTTG                  |
| CMK1-F                              | GAGCTTTTCGACCGTATTTGC                  |
| CMK1-R                              | GCTCAGGTAAAGTAGGTTCTCG                 |
| DUN1-F                              | GTCCTATGCCTGACACGAAC                   |
| DUN1-R                              | TGAGGCAGTGTGATTTGAG                    |
| CRZ1-F                              | TGAGAAACTTTGAGGGCAGAC                  |
| CRZ1-R                              | CGGTACTTCCATTGGCATAAGG                 |
| SCJ1-F                              | GGTCACGTAGAGATGGTCAA                   |
| SCJ1-R                              | CCTGTATTTCTCCCACACTG                   |
| SIL1-F                              | GACTTAGAGGGTCTGCCTGT                   |
| SIL1-R                              | GAAGTACATGTCGTGGGAAA                   |
| ERV29-F                             | CGGCTACGGTCTTATTTTCG                   |
| ERV29-R                             | CAAAGCCGATGAAGAGGAAG                   |
| SEC61-F                             | AGCCATCTCCGGTCTTACCT                   |
| SEC61-R                             | CTGGTCCTTAAGCTGCTTGG                   |
| PMT4-F                              | GTTGGTGTTTTCGCCTTCAT                   |
| PMT4-R                              | CGTGAGGACTGCAAAGTGAA                   |
| PDI1-F                              | GTTGTCGCTTACTGTCCAG                    |
| PDI1-R                              | CGTCAAATTTCTTGTCGAAG                   |
| WBP1-F                              | GAGGCCATTCCTCACCTACA                   |
| WBP1-R                              | TTTGGTAACGGTGGCTTTTC                   |
| PMT1-F                              | GGCGAGAAGAAGGACATCAA                   |
| PMT1-R                              | CCCTTGTCGTCTCGGTACTC                   |
| PPS1-F                              | CTTCCGAGATTGCACCAAAT                   |
| PPS1-R                              | AGTTGGTGGCAGAATTGACC                   |
| PMT2-F                              | GAGTCATTGGCCTGGTTGTT                   |
| PMT2-R                              | GAACGTCAGGATGGCAAAGT                   |
| KAR2-F                              | AACGGTCTCGAGAACTATGC                   |
| KAR2-R                              | TCCTTCTGCTCCTCAAAATC                   |
| RT-HPH-F                            | ATGTCCTGCGGGTAAATAGC                   |
| RT-HPH-R                            | GATGCAATAGGTCAGGCTCTC                  |
| RT-Tubulin-F                        | ACAACCTTCGTCTTCGGTCAG                  |
| RT-Tubulin-R                        | GTGATCTGGAAACCCTGGAG                   |
| <b>Primers for yeast two hybrid</b> |                                        |
| ATG16-AD-F                          | GGAGGCCAGTGAATTCATGTCTTCGCTGCCGGAC     |
| ATG16-AD-R                          | CGAGCTCGATGGATCCTCCTCGTTTGCGGAATTC     |
| CNB1-AD-F                           | GGAGGCCAGTGAATTCATGGGCAACACGACCAGCAATG |
| CNB1-AD-R                           | CGAGCTCGATGGATCCGAATTGGTCTAGCGTCATGC   |
| CBP7-BD-F                           | CATGGAGGCCGAATTCATGCCGTTCTGGGCGCGCAG   |

|                                             |                                                 |
|---------------------------------------------|-------------------------------------------------|
| CBP7-BD-R                                   | GCAGGTCGACGGATCCTGCAATGCTCCACACGGG              |
| <b>Primers for Pulldown</b>                 |                                                 |
| CBP7-FLAG-F                                 | GACAAGGTCGACAAGCTTATGCCGTTCTGGGCGCGCAGGC        |
| CBP7-FLAG-R                                 | GAGTGCGGGCCGCAAGCTTTGCAATGCTCCACACGGGCGCC       |
| CNB1-GST-F                                  | CGTGGATCCCCGGAATTCATGGGCAACACGACCAGCAATG        |
| CNB1-GST-R                                  | GAGTCGACCCGGGAATTCGAATTGGTCTAGCGTCATGC          |
| <b>Primers for fluorescence observation</b> |                                                 |
| CNB1-GFP-F                                  | ATCACAATGGCCGGATCCATGGGCAACACGACCAGCAA          |
| CNB1-GFP-R                                  | CTTGCTCACCATCCCGGGGAATTGGTCTGCAAATCGT           |
| H <sub>2</sub> B-mCherry-F                  | ATGGTCGGATCCATCCCCGGGATGCCCCCAAGGCCGCTGACA<br>A |
| H <sub>2</sub> B-mCherry-R                  | TTACTGCAGGTCGACTCTAGAGCCGCCGGTGGAGTGGCGGCC      |
